# Supplementary material for: TGF-β/Smad3 inhibit vascular smooth muscle cell apoptosis through an autocrine signaling mechanism involving VEGF-A
Source: PubMed Central journal article supplement — Cell Death Dis. 2014 Jul 10;5(7):e1317–. doi: 10.1038/cddis.2014.282 (PMC4123076; doi:10.1038/cddis.2014.282), 2014-07-10
Supplement: cddis2014282x2.pdf [file cddis2014282x2.pdf]

**Table S1. Changes of growth factor expression in response to TGF- $\beta$ /Smad3 stimulation**

| Growth factors | VEGF-A | VEGF-A receptor | PDGF-BB | FGF-2 | SCF |
|----------------|--------|-----------------|---------|-------|-----|
| Fold change    | 7.7    | 5.5             | 4.7     | 4.6   | 3.3 |

Rat vascular SMCs were infected with either AdGFP or AdSmad3 followed by treatment with solvent (to AdGFP cells) or TGF- $\beta$  (5 ng/ml, to AdSmad3 cells). After 24 h of treatment cells were collected, RNA was then extracted and subjected to microarray analysis. VEGF, vascular endothelial growth factor; PDGF, platelet-derived growth factor; FGF, fibroblast growth factor; SCF, stem cell factor.
